# Supplementary material
Source: PubMed Central journal article supplement (PMC6795395)
Supplement: jciinsight-4-130848-s079.pdf [file jciinsight-4-130848-s079.pdf]

## SUPPLEMENTAL MATERIAL

### Supplemental Figures & Legends

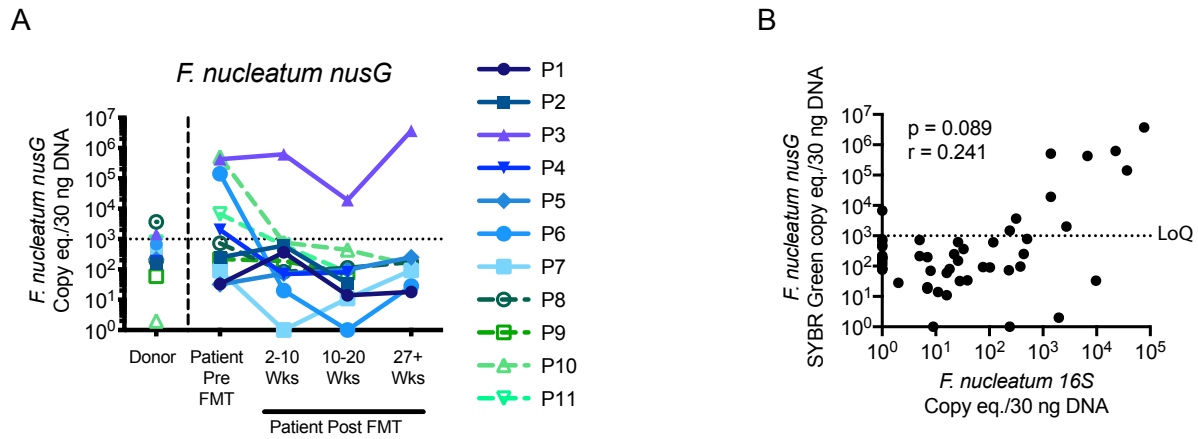

**Supplemental Figure 1. Longitudinal levels of *Fusobacterium nucleatum nusG*.** (A) Stool DNA was examined for the presence of the *F. nucleatum*-specific gene *nusG* by SYBR Green qPCR. Data are shown from FMT donors, patients prior to FMT, and patients at various time points post FMT (2-10 weeks, 10-20 weeks, and >27 weeks). Colors denote the source of the FMT donor stool, with familial donors in shades of blue/purple (P1-P7) and commercial stool bank donors shown in shades of green (P8-P11). Undetectable data points were assigned a value of 1 for display purposes on the log<sub>10</sub> scale. Due to the use of SYBR green reagents, the background threshold limit (or limit of quantitation, LoQ, dotted line) for *nusG* was 10<sup>3</sup> copies per 30 ng DNA, compared to 10<sup>0</sup> for *F. nucleatum 16S* rDNA and *fadA* genes using Taqman qPCR (see Methods). (B) Spearman's correlation of *nusG* vs. *F. nucleatum 16S* copy numbers in direct stool extracts from the FMT patients and donors.

**Supplemental Table 1. qPCR Primers and Probes**

| Target                         | Sequence 5' - 3'                         | Fragment Annealing |            | Reference                                                 |
|--------------------------------|------------------------------------------|--------------------|------------|-----------------------------------------------------------|
|                                |                                          | size (bp)          | Temp. (°C) |                                                           |
| <i>E. coli</i> 16S F           | CATGCCGCGTGTATGAAGAA                     | 96                 | 60         | Arthur <i>et al.</i> , 2012                               |
| <i>E. coli</i> 16S R           | CGG GTA ACG TCA ATG AGC AAA              | 96                 | 60         | Arthur <i>et al.</i> , 2012                               |
| <i>E. coli</i> 16S HEX         | HEX - TCGGGTTGTAAAGTACTTTTCAGCGGG - BHQ1 |                    | 60         | This study                                                |
| <i>clbB</i> ( <i>pks</i> ) F   | GCGCATCCTCAAGAGTAAATA                    | 280                | 60         | Arthur <i>et al.</i> , 2012                               |
| <i>clbB</i> ( <i>pks</i> ) R   | GCGCTCTATGCTCATCAACC                     | 280                | 60         | Arthur <i>et al.</i> , 2012                               |
| <i>clbB</i> ( <i>pks</i> ) FAM | FAM - TATTCGACACAGAACAACGCCGGT - BHQ1    |                    | 60         | This study                                                |
| <i>B. fragilis</i> 16S F       | TCRGGAAAGAAAGCTTGCT                      | 163                | 58         | Tong <i>et al.</i> , 2011                                 |
| <i>B. fragilis</i> 16S R       | CATCCTTTACCGGAATCCT                      | 163                | 58         | Tong <i>et al.</i> , 2011                                 |
| <i>B. fragilis</i> 16S HEX     | HEX - AGGGACTGGAAGGCTTTACTGCTTC - BHQ1   |                    | 58         | Tong <i>et al.</i> , 2011                                 |
| <i>bft</i> F                   | GCGAACTCGGTTTATGCAGT                     | 281                | 58         | Odamaki <i>et al.</i> , 2012; Boleij <i>et al.</i> , 2015 |
| <i>bft</i> R                   | GTTGTAGACATCCCACTGGC                     | 281                | 58         | Kato <i>et al.</i> , 2000; Boleij <i>et al.</i> , 2015    |
| <i>bft</i> FAM                 | FAM - AGCAGAAGGTTATGACGA - NFQ - MGB     |                    | 58         | This study                                                |
| <i>F. nucleatum</i> 16S F      | GGATTTATTGGGCGTAAAGC                     | 162                | 60         | Boutaga <i>et al.</i> , 2005                              |
| <i>F. nucleatum</i> 16S R      | GGCATTCTACAAATATCTACGAA                  | 162                | 60         | Boutaga <i>et al.</i> , 2005                              |
| <i>F. nucleatum</i> 16S HEX    | HEX - TGCAGGGCTCAACTCTGTATTGCG - BHQ1    |                    | 60         | This study                                                |
| <i>fadA</i> F                  | CAAATCAAGAAGAAGCAAGATTCAAT               | 121                | 58         | This study                                                |
| <i>fadA</i> R                  | GCTTGAAGTCTTTGAGCTCT                     | 121                | 58         | Rubinstein <i>et al.</i> , 2013                           |
| <i>fadA</i> FAM                | FAM - CGCTGCTAGACAAGCACTAGCACA - BHQ1    |                    | 58         | This study                                                |
| <i>nusG</i> F                  | CAACCATTACTTTAACTCTACCATGTTCA            | 161                | 60         | Castellarin <i>et al.</i> , 2012                          |
| <i>nusG</i> R                  | GTTGACTTTACAGAAGGAGATTATGTA AAAATC       | 161                | 60         | Castellarin <i>et al.</i> , 2012                          |
| <i>nusG</i> probe              | N/A - SYBR green used instead            |                    | 60         | N/A                                                       |

**Supplemental Table 2. Percentage of patients positive by direct stool DNA extractions.**

| Sample                     | <i>E. coli</i> 16S    | <i>pks</i> | <i>B. fragilis</i> 16S | <i>bft</i> | <i>F. nucleatum</i> 16S | <i>fadA</i> |
|----------------------------|-----------------------|------------|------------------------|------------|-------------------------|-------------|
| Donors (N=11) <sup>a</sup> | 91% (10) <sup>b</sup> | 36% (4)    | 82% (9)                | 18% (2)    | 73% (8)                 | 73% (8)     |
| Patients pre-FMT (N=11)    | 100% (11)             | 27% (3)    | 55% (6)                | 18% (2)    | 91% (10)                | 91% (10)    |
| Patients post-FMT (N=11)   | 100% (11)             | 36% (4)    | 82% (9)                | 27% (3)    | 64% (7)                 | 64% (7)     |

<sup>a</sup> Total number of donors or patients tested by total stool DNA qPCR

<sup>b</sup> Percentage and (number) of donors or patients positive for each respective species-specific *16S* rRNA-encoding gene or virulence factor

**Supplemental Table 3. Percentage of patients positive by stool culture.**

| Sample                     | <i>E. coli</i> 16S    | <i>pks</i> | <i>B. fragilis</i> 16S | <i>bft</i> | <i>F. nucleatum</i> 16S | <i>fadA</i> |
|----------------------------|-----------------------|------------|------------------------|------------|-------------------------|-------------|
| Donors (N=11) <sup>a</sup> | 91% (10) <sup>b</sup> | 64% (7)    | 100% (11)              | 73% (8)    | 91% (10)                | 82% (9)     |
| Patients pre-FMT (N=11)    | 100% (11)             | 45% (5)    | 55% (6)                | 18% (2)    | 73% (8)                 | 91% (10)    |
| Patients post-FMT (N=11)   | 100% (11)             | 64% (7)    | 100% (11)              | 82% (9)    | 91% (10)                | 82% (9)     |

<sup>a</sup> Total number of donors or patients tested by culture

<sup>b</sup> Percentage and (number) of donors or patients positive for each respective species-specific *16S* rRNA-encoding gene or virulence factor (at least 1 of 5 colonies were positive if patient was called positive)

**Supplemental Table 4. Percentage of all colonies positive by stool culture.**

| Plate                                   | MacConkey agar        |            | BBE agar               |            | FSA agar                |             |
|-----------------------------------------|-----------------------|------------|------------------------|------------|-------------------------|-------------|
|                                         | <i>E. coli</i> 16S    | <i>pks</i> | <i>B. fragilis</i> 16S | <i>bft</i> | <i>F. nucleatum</i> 16S | <i>fadA</i> |
| Donor colonies (N=50)                   |                       |            |                        |            |                         |             |
| MacConkey, 55 BBE, 51 FSA) <sup>a</sup> | 98% (49) <sup>b</sup> | 44% (22)   | 76% (42)               | 27% (15)   | 57% (27)                | 43% (22)    |
| Patient pre-FMT colonies (N=46)         |                       |            |                        |            |                         |             |
| MacConkey, 45 BBE, 49 FSA)              | 100% (46)             | 37% (17)   | 36% (16)               | 11% (5)    | 55% (27)                | 45% (22)    |
| Patient post-FMT colonies (N=114)       |                       |            |                        |            |                         |             |
| MacConkey, 140 BBE, 138 FSA)            | 96% (109)             | 50% (57)   | 74% (104)              | 33% (46)   | 50% (69)                | 35% (48)    |

<sup>a</sup> Total number of colonies tested from donors or patients for each respective agar (max of 5 colonies tested per donor/patient per time point, although in some cases fewer than 5 colonies grew; bottom row represents the sum of up to 3 post-FMT time points for the patients)

<sup>b</sup> Percentage and (number) of colonies from donors or patients positive for each respective species-specific *16S* rRNA-encoding gene or virulence factor

**Supplemental Table 5. Raw culture data from stool samples.**

| Patient/ Donor<br>Number | Baseline (#positive / #screened) |                  |                   | 2-10 wks (#positive / #screened) |                  |                   | 10-20 wks (#positive / #screened) |                  |                   | > 6 months (#positive / #screened) |                  |                   |
|--------------------------|----------------------------------|------------------|-------------------|----------------------------------|------------------|-------------------|-----------------------------------|------------------|-------------------|------------------------------------|------------------|-------------------|
|                          | <i>Ec16S clbB</i>                | <i>Bf16S bft</i> | <i>Fn16S fadA</i> | <i>Ec16S clbB</i>                | <i>Bf16S bft</i> | <i>Fn16S fadA</i> | <i>Ec16S clbB</i>                 | <i>Bf16S bft</i> | <i>Fn16S fadA</i> | <i>Ec16S clbB</i>                  | <i>Bf16S bft</i> | <i>Fn16S fadA</i> |
| Donor #1                 | 5/5 5/5                          | 4/5 1/5          | 5/5 3/5           |                                  |                  |                   |                                   |                  |                   |                                    |                  |                   |
| Patient #1               | 5/5 4/5                          | 1/5 0/5          | 4/5 2/5           | 5/5 5/5                          | 5/5 3/5          | 2/5 1/5           | 1/1 1/1                           | 0/0 0/0          | 1/5 0/5           | 5/5 5/5                            | 4/5 3/5          | 5/5 0/5           |
| Donor #2                 | 5/5 1/5                          | 5/5 2/5          | 1/1 1/1           |                                  |                  |                   |                                   |                  |                   |                                    |                  |                   |
| Patient #2               | 5/5 4/5                          | 0/5 0/5          | 3/5 3/5           | 5/5 5/5                          | 3/5 2/5          | 4/5 3/5           | 5/5 5/5                           | 1/5 1/5          | 1/1 1/1           |                                    |                  |                   |
| Donor #3                 | 5/5 0/5                          | 5/5 3/5          | 4/5 2/5           |                                  |                  |                   |                                   |                  |                   |                                    |                  |                   |
| Patient #3               | 5/5 0/5                          | 0/0 0/0          | 2/2 1/2           | 3/3 0/3                          | 4/5 0/5          | 5/5 5/5           | 1/1 0/1                           | 5/5 2/5          | 2/2 2/2           | 5/5 0/5                            | 5/5 3/5          | 5/5 3/5           |
| Donor #4                 | 0/1 0/1                          | 3/5 2/5          | 5/5 5/5           |                                  |                  |                   |                                   |                  |                   |                                    |                  |                   |
| Patient #4               | 5/5 1/5                          | 0/5 0/5          | 4/5 1/5           | 5/5 2/5                          | 5/5 0/5          | 2/5 2/5           | 5/5 0/5                           | 5/5 0/5          | 3/5 3/5           |                                    |                  |                   |
| Donor #5                 | 5/5 0/5                          | 5/5 0/5          | 1/5 3/5           |                                  |                  |                   |                                   |                  |                   |                                    |                  |                   |
| Patient #5               | 1/1 0/1                          | 0/0 0/0          | 1/5 1/1           | 0/0 0/0                          | 5/5 0/5          | 1/5 1/5           | 6/6 3/6                           | 5/5 0/5          | 0/5 1/5           | 2/2 1/2                            | 5/5 0/5          | 1/5 1/5           |
| Donor #6                 | 5/5 0/5                          | 3/5 2/5          | 0/5 1/5           |                                  |                  |                   |                                   |                  |                   |                                    |                  |                   |
| Patient #6               | 5/5 3/5                          | 0/5 0/5          | 1/2 1/2           | 5/5 0/5                          | 5/5 5/5          | 1/5 1/5           | 5/5 0/5                           | 2/5 0/5          | 2/5 1/5           | 5/5 0/5                            | 0/5 1/5          | 0/5 1/5           |
| Donor #7                 | 5/5 1/5                          | 2/5 2/5          | 2/5 1/5           |                                  |                  |                   |                                   |                  |                   |                                    |                  |                   |
| Patient #7               | 3/3 0/3                          | 0/5 0/5          | 4/5 3/5           | 0/0 0/0                          | 2/5 1/5          | 3/5 2/5           | 4/4 0/4                           | 1/5 1/5          | 3/5 3/5           | 4/4 0/4                            | 2/5 2/5          | 2/5 2/5           |
| Donor #8                 | 5/5 5/5                          | 3/5 0/5          | 2/5 0/5           |                                  |                  |                   |                                   |                  |                   |                                    |                  |                   |
| Patient #8               | 5/5 5/5                          | 5/5 2/5          | 0/5 2/5           | 5/5 5/5                          | 5/5 0/5          | 0/5 0/5           | 5/5 5/5                           | 4/5 2/5          | 0/5 0/5           | 5/5 5/5                            | 2/5 1/5          | 0/5 0/5           |
| Donor #9                 | 5/5 5/5                          | 5/5 0/5          | 1/5 0/5           |                                  |                  |                   |                                   |                  |                   |                                    |                  |                   |
| Patient #9               | 3/3 0/3                          | 4/5 0/5          | 0/5 0/5           | 4/4 3/4                          | 5/5 4/5          | 2/5 0/5           | 5/5 4/5                           | 4/5 1/5          | 1/5 0/5           |                                    |                  |                   |
| Donor #10                | 4/4 0/4                          | 5/5 3/5          | 3/5 1/5           |                                  |                  |                   |                                   |                  |                   |                                    |                  |                   |
| Patient #10              | 4/4 0/4                          | 3/5 3/5          | 3/5 3/5           | 4/4 0/4                          | 3/5 3/5          | 4/5 0/5           | 0/0 0/0                           | 4/5 2/5          | 5/5 4/5           | 0/5 0/5                            | 5/5 4/5          | 5/5 5/5           |
| Donor #11                | 5/5 5/5                          | 2/5 0/5          | 5/5 5/5           |                                  |                  |                   |                                   |                  |                   |                                    |                  |                   |
| Patient #11              | 5/5 0/5                          | 3/5 0/5          | 5/5 3/5           | 5/5 4/5                          | 3/5 0/5          | 4/5 1/5           | 5/5 4/5                           | 5/5 5/5          | 5/5 3/5           |                                    |                  |                   |
